# Supplementary material for: Laser spectroscopic characterization of supersonic jet cooled 2,7-diazaindole
Source: Royal Society of Chemistry journal article supplement (doi:10.1039/d3cp03010e), 2023-01-01
Supplement: d3cp03010e1.pdf [file d3cp03010e1.pdf]

## Laser Spectroscopic Characterization of Supersonic Jet Cooled 2,7-Diazaindole (27DAI)

Simran Baweja,<sup>a</sup> Bhavika Kalal<sup>a</sup> and Surajit Maity<sup>\*, a</sup>

Department of Chemistry, IIT Hyderabad, Kandi, Sangareddy, Telangana, India, PIN 502284,

\*Email: surajitmaity@chy.iith.ac.in

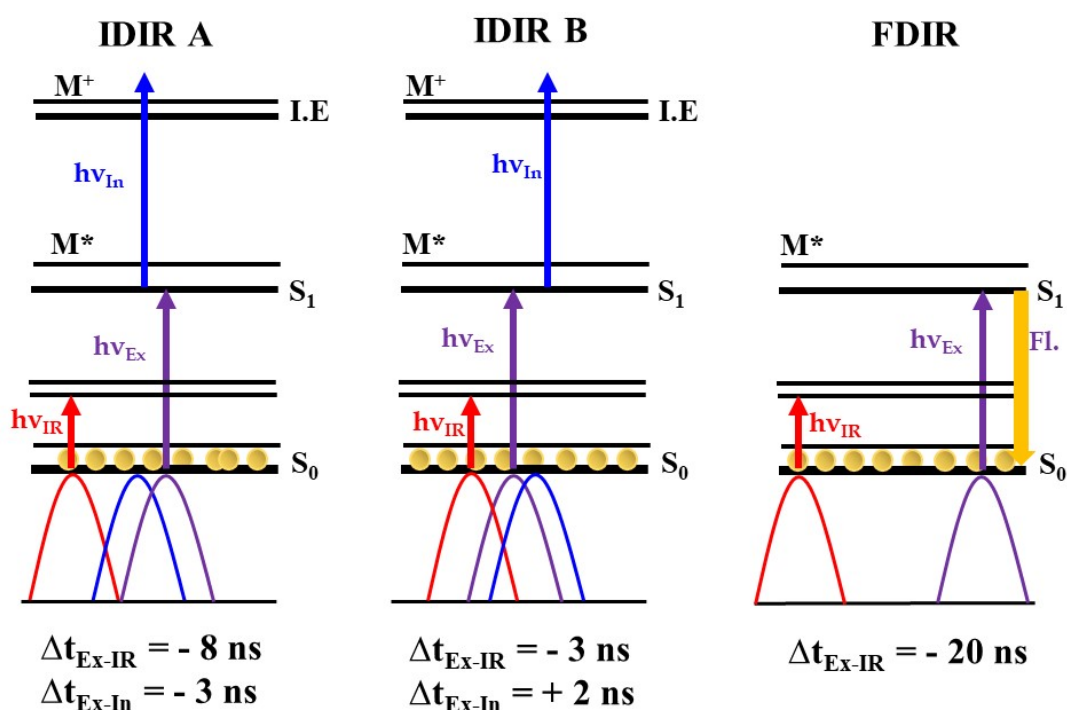

**Scheme S1.** Schematic representation of the laser delays showing IR laser interaction with the molecular beam (IDIR A) 8ns before the excitation (Ex) laser i.e.,  $\Delta t_{Ex-IR} = -8 \text{ ns}$ , (IDIR B) 3 ns before the excitation (Ex) laser i.e.,  $\Delta t_{Ex-IR} = -3 \text{ ns}$  and (FDIR) 20 ns before the excitation (Ex) laser i.e.,  $\Delta t_{Ex-IR} = -20 \text{ ns}$ . The ionization laser pulses for IDIR techniques are also shown.

<sup>a</sup> Department of Chemistry, IIT Hyderabad, Kandi, Sangareddy, Telangana, India, 502284

\*E-mail: surajitmaity@chy.iith.ac.in

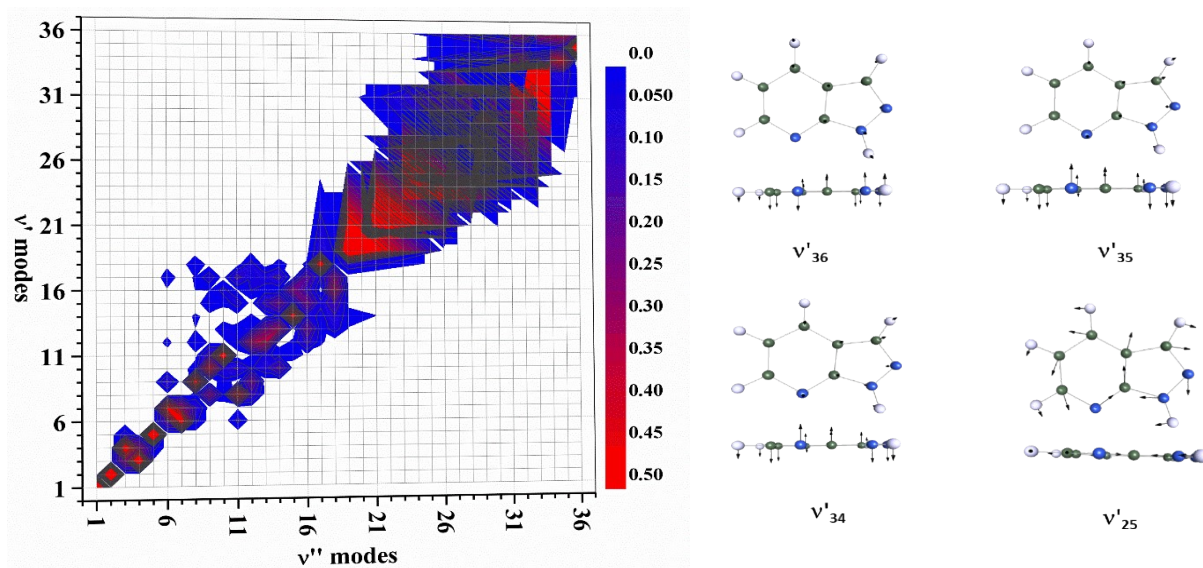

Figure S1. Duschinsky matrix of vibrational frequencies ( $v''$  in  $S_0$  and  $v'$  in  $S_1$ ) of 2,7-diazaindole

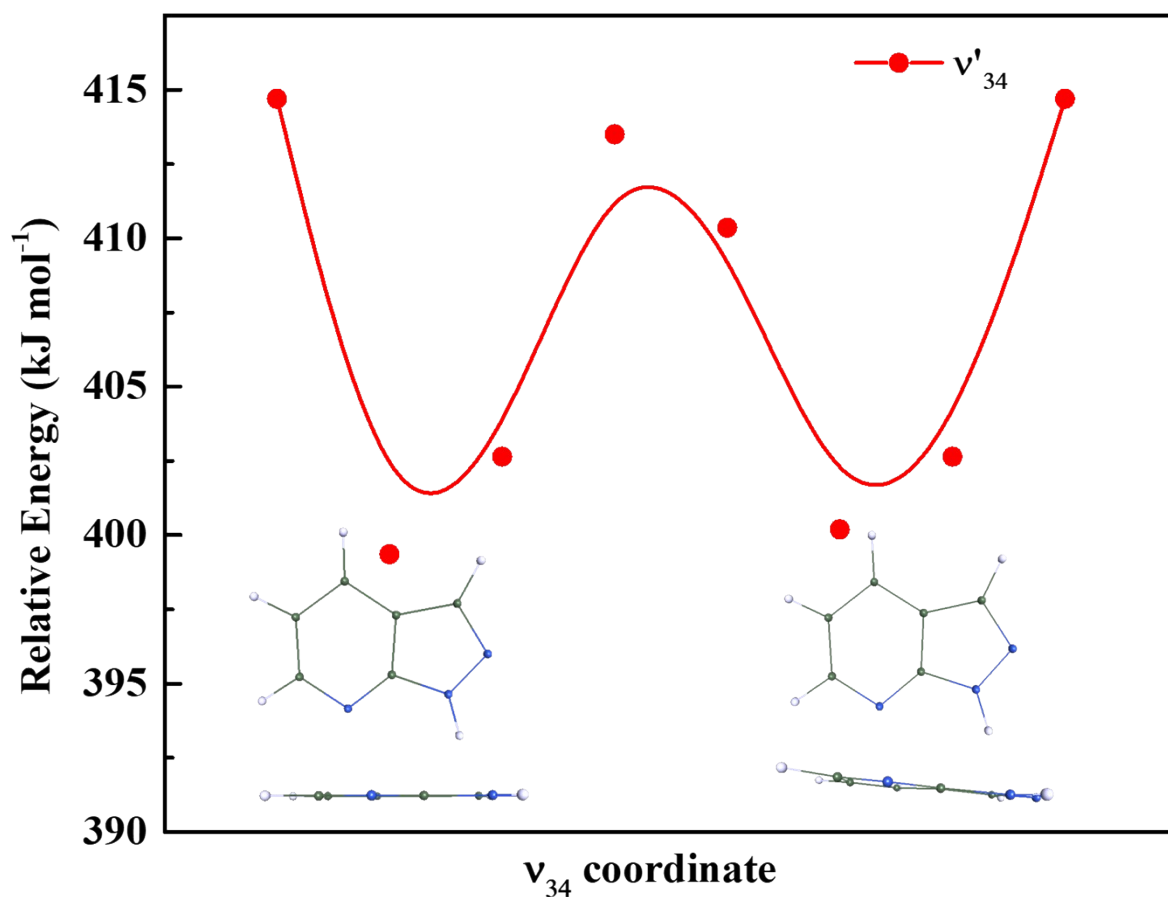

Figure S2. Potential surface showing a double minima for  $v'_{34}$  mode in the R2PI spectra of 2,7-diazaindole.



**Table S1: Calculated vibrational frequencies in cm<sup>-1</sup> of 27DAI molecule at three different methods.**

| Mode            | B3LYP/def-SVP              |                |                            |                | B3LYP-D4/def2-TZVPP        |                |                            |                | ADC(2)(MP2)/cc-pVDZ        |                |                            |                |
|-----------------|----------------------------|----------------|----------------------------|----------------|----------------------------|----------------|----------------------------|----------------|----------------------------|----------------|----------------------------|----------------|
|                 | Symmetry (S <sub>0</sub> ) | S <sub>0</sub> | Symmetry (S <sub>1</sub> ) | S <sub>1</sub> | Symmetry (S <sub>0</sub> ) | S <sub>0</sub> | Symmetry (S <sub>1</sub> ) | S <sub>1</sub> | Symmetry (S <sub>0</sub> ) | S <sub>0</sub> | Symmetry (S <sub>1</sub> ) | S <sub>1</sub> |
| v <sub>36</sub> | a''                        | 225            | a''                        | 133            | a''                        | 218            | a''                        | 169            | a''                        | 227            | a''                        | 242            |
| v <sub>35</sub> | a''                        | 258            | a''                        | 184            | a''                        | 252            | a''                        | 210            | a''                        | 258            | a''                        | 287            |
| v <sub>34</sub> | a''                        | 446            | a''                        | 316            | a''                        | 436            | a''                        | 318            | a''                        | 434            | a''                        | 456            |
| v <sub>33</sub> | a''                        | 556            | a''                        | 380            | a''                        | 490            | a''                        | 385            | a''                        | 536            | a''                        | 541            |
| v <sub>32</sub> | a''                        | 598            | a''                        | 542            | a''                        | 596            | a''                        | 539            | a''                        | 597            | a''                        | 603            |
| v <sub>31</sub> | a''                        | 683            | a''                        | 551            | a''                        | 677            | a''                        | 575            | a''                        | 688            | a''                        | 693            |
| v <sub>30</sub> | a''                        | 801            | a''                        | 637            | a''                        | 797            | a''                        | 644            | a''                        | 760            | a''                        | 749            |
| v <sub>29</sub> | a''                        | 813            | a''                        | 723            | a''                        | 810            | a''                        | 732            | a''                        | 815            | a''                        | 783            |
| v <sub>28</sub> | a''                        | 874            | a''                        | 792            | a''                        | 874            | a''                        | 780            | a''                        | 843            | a''                        | 837            |
| v <sub>27</sub> | a''                        | 971            | a''                        | 842            | a''                        | 969            | a''                        | 857            | a''                        | 950            | a''                        | 899            |
| v <sub>26</sub> | a''                        | 1006           | a''                        | 951            | a''                        | 997            | a''                        | 940            | a''                        | 979            | a''                        | 951            |
| v <sub>25</sub> | a'                         | 434            | a'                         | 409            | a'                         | 431            | a'                         | 409            | a'                         | 407            | a'                         | 433            |
| v <sub>24</sub> | a'                         | 554            | a'                         | 513            | a'                         | 560            | a'                         | 520            | a'                         | 540            | a'                         | 540            |
| v <sub>23</sub> | a'                         | 649            | a'                         | 636            | a'                         | 652            | a'                         | 634            | a'                         | 637            | a'                         | 629            |
| v <sub>22</sub> | a'                         | 785            | a'                         | 754            | a'                         | 785            | a'                         | 753            | a'                         | 780            | a'                         | 760            |
| v <sub>21</sub> | a'                         | 917            | a'                         | 891            | a'                         | 925            | a'                         | 898            | a'                         | 907            | a'                         | 900            |
| v <sub>20</sub> | a'                         | 947            | a'                         | 936            | a'                         | 951            | a'                         | 936            | a'                         | 932            | a'                         | 921            |
| v <sub>19</sub> | a'                         | 1052           | a'                         | 1031           | a'                         | 1054           | a'                         | 1029           | a'                         | 1057           | a'                         | 1003           |
| v <sub>18</sub> | a'                         | 1127           | a'                         | 1064           | a'                         | 1102           | a'                         | 1047           | a'                         | 1121           | a'                         | 1027           |
| v <sub>17</sub> | a'                         | 1130           | a'                         | 1111           | a'                         | 1142           | a'                         | 1067           | a'                         | 1136           | a'                         | 1082           |
| v <sub>16</sub> | a'                         | 1228           | a'                         | 1121           | a'                         | 1234           | a'                         | 1129           | a'                         | 1217           | a'                         | 1194           |
| v <sub>15</sub> | a'                         | 1257           | a'                         | 1188           | a'                         | 1264           | a'                         | 1200           | a'                         | 1243           | a'                         | 1205           |
| v <sub>14</sub> | a'                         | 1322           | a'                         | 1226           | a'                         | 1319           | a'                         | 1228           | a'                         | 1322           | a'                         | 1265           |
| v <sub>13</sub> | a'                         | 1339           | a'                         | 1257           | a'                         | 1332           | a'                         | 1253           | a'                         | 1346           | a'                         | 1270           |
| v <sub>12</sub> | a'                         | 1374           | a'                         | 1302           | a'                         | 1357           | a'                         | 1304           | a'                         | 1380           | a'                         | 1336           |
| v <sub>11</sub> | a'                         | 1415           | a'                         | 1367           | a'                         | 1407           | a'                         | 1368           | a'                         | 1456           | a'                         | 1387           |
| v <sub>10</sub> | a'                         | 1449           | a'                         | 1409           | a'                         | 1441           | a'                         | 1395           | a'                         | 1475           | a'                         | 1433           |
| v <sub>9</sub>  | a'                         | 1506           | a'                         | 1437           | a'                         | 1497           | a'                         | 1440           | a'                         | 1502           | a'                         | 1448           |

<sup>a</sup> Department of Chemistry, IIT Hyderabad, Kandi, Sangareddy, Telangana, India, 502284

\*E-mail: surajitmaity@chy.iith.ac.in

|                |    |      |    |      |    |      |    |      |    |      |    |      |
|----------------|----|------|----|------|----|------|----|------|----|------|----|------|
| v <sub>8</sub> | a' | 1546 | a' | 1500 | a' | 1540 | a' | 1488 | a' | 1556 | a' | 1475 |
| v <sub>7</sub> | a' | 1633 | a' | 1615 | a' | 1618 | a' | 1563 | a' | 1645 | a' | 1586 |
| v <sub>6</sub> | a' | 1666 | a' | 1647 | a' | 1647 | a' | 1620 | a' | 1682 | a' | 1644 |
| v <sub>5</sub> | a' | 3150 | a' | 3164 | a' | 3159 | a' | 3177 | a' | 3240 | a' | 3220 |
| v <sub>4</sub> | a' | 3182 | a' | 3185 | a' | 3182 | a' | 3194 | a' | 3281 | a' | 3245 |
| v <sub>3</sub> | a' | 3201 | a' | 3237 | a' | 3202 | a' | 3237 | a' | 3318 | a' | 3261 |
| v <sub>2</sub> | a' | 3232 | a' | 3241 | a' | 3238 | a' | 3246 | a' | 3325 | a' | 3264 |
| v <sub>1</sub> | a' | 3645 | a' | 3557 | a' | 3662 | a' | 3577 | a' | 3764 | a' | 3572 |

**Table S2: Ground state geometries of 27DAI molecule at three different methods.**

|   | B3LYP/def-SVP |         |   |   | B3LYP-D4/def2-TZVPP |         |   |   | ADC(2)(MP2)/cc-pVDZ |         |   |
|---|---------------|---------|---|---|---------------------|---------|---|---|---------------------|---------|---|
|   | X             | Y       | Z |   | X                   | Y       | Z |   | X                   | Y       | Z |
| C | -1.8986       | -0.5241 | 0 | C | 1.9086              | 0.8004  | 0 | C | -1.8988             | -0.5262 | 0 |
| C | -1.8192       | 0.8906  | 0 | N | 2.577               | -0.3341 | 0 | C | -1.8225             | 0.8954  | 0 |
| N | -0.6827       | 1.581   | 0 | N | 1.6546              | -1.3251 | 0 | N | -0.6824             | 1.6037  | 0 |
| C | 0.4186        | 0.829   | 0 | C | 0.3838              | -0.8428 | 0 | C | 0.417               | 0.8253  | 0 |
| N | 1.7143        | 1.2612  | 0 | C | 0.5036              | 0.5675  | 0 | N | 1.7159              | 1.2611  | 0 |
| N | 2.5965        | 0.2412  | 0 | C | -0.6808             | 1.307   | 0 | N | 2.6107              | 0.2541  | 0 |
| C | 1.8894        | -0.8746 | 0 | C | -1.8664             | 0.5963  | 0 | C | 1.8871              | -0.8814 | 0 |
| C | 0.4855        | -0.5929 | 0 | C | -1.8474             | -0.8113 | 0 | C | 0.4879              | -0.5995 | 0 |
| C | -0.7365       | -1.2881 | 0 | N | -0.7439             | -1.5488 | 0 | C | -0.7396             | -1.3017 | 0 |
| H | -2.881        | -1.0012 | 0 | H | 2.4415              | 1.7372  | 0 | H | -2.8851             | -1.0001 | 0 |
| H | -2.7448       | 1.4784  | 0 | H | 1.9467              | -2.2862 | 0 | H | -2.7481             | 1.4833  | 0 |
| H | 2.3951        | -1.8405 | 0 | H | -0.6751             | 2.3889  | 0 | H | 2.4022              | -1.8418 | 0 |
| H | -0.7756       | -2.3807 | 0 | H | -2.8183             | 1.108   | 0 | H | -0.7818             | -2.396  | 0 |
| H | 2.0391        | 2.2209  | 0 | H | -2.7839             | -1.357  | 0 | H | 2.0374              | 2.2238  | 0 |

**Table S3: Excited state geometries of 27DAI molecule at three different methods.**

| B3LYP/def-SVP |         |         |   | B3LYP-D4/def2-TZVPP |         |         |   | ADC(2)(MP2)/cc-pVDZ |         |         |   |
|---------------|---------|---------|---|---------------------|---------|---------|---|---------------------|---------|---------|---|
|               | X       | Y       | Z |                     | X       | Y       | Z |                     | X       | Y       | Z |
| C             | -1.9099 | -0.5093 | 0 | C                   | -1.9058 | -0.4959 | 0 | C                   | -0.56   | -1.8895 | 0 |
| C             | -1.8336 | 0.8812  | 0 | C                   | -1.829  | 0.88    | 0 | C                   | 0.8458  | -1.8771 | 0 |
| N             | -0.6604 | 1.6196  | 0 | N                   | -0.6438 | 1.6131  | 0 | N                   | 1.6271  | -0.705  | 0 |
| C             | 0.3887  | 0.7992  | 0 | C                   | 0.3983  | 0.7978  | 0 | C                   | 0.8344  | 0.3657  | 0 |
| N             | 1.7487  | 1.2394  | 0 | N                   | 1.7471  | 1.2279  | 0 | N                   | 1.2975  | 1.6678  | 0 |
| N             | 2.6458  | 0.2827  | 0 | N                   | 2.6406  | 0.2672  | 0 | N                   | 0.3216  | 2.6786  | 0 |
| C             | 1.8939  | -0.8607 | 0 | C                   | 1.8669  | -0.8742 | 0 | C                   | -0.8143 | 1.9363  | 0 |
| C             | 0.4678  | -0.5833 | 0 | C                   | 0.4678  | -0.5846 | 0 | C                   | -0.5906 | 0.5113  | 0 |
| C             | -0.7484 | -1.3374 | 0 | C                   | -0.7473 | -1.3201 | 0 | C                   | -1.3623 | -0.6911 | 0 |
| H             | -2.901  | -0.9709 | 0 | H                   | -2.8862 | -0.953  | 0 | H                   | -1.0646 | -2.8626 | 0 |
| H             | -2.7564 | 1.4698  | 0 | H                   | -2.7332 | 1.4731  | 0 | H                   | 1.407   | -2.8163 | 0 |
| H             | 2.4081  | -1.8228 | 0 | H                   | 2.3672  | -1.8293 | 0 | H                   | 2.2859  | 1.9348  | 0 |
| H             | -0.7869 | -2.4248 | 0 | H                   | -0.7911 | -2.3963 | 0 | H                   | -1.7727 | 2.4613  | 0 |
| H             | 2.0437  | 2.2171  | 0 | H                   | 2.0486  | 2.1943  | 0 | H                   | -2.4547 | -0.714  | 0 |
